# Supplementary material
Source: PubMed Central journal article supplement (PMC4961555)
Supplement: NIHMS790119-supplement-Supplemental_Digital_Content.pdf [file NIHMS790119-supplement-Supplemental_Digital_Content.pdf]

**Appendix 1. Mortality Events for Each Cause of Death by Category of Hypertensive Disease With Unadjusted and Adjusted Hazard Rate Ratios and 95% Confidence Intervals**

| Cause of Death                                         | Hypertensive Disease Category | Number of deaths | Unadjusted |                         | Adjusted* |                         |
|--------------------------------------------------------|-------------------------------|------------------|------------|-------------------------|-----------|-------------------------|
|                                                        |                               |                  | HR         | 95% Confidence Interval | HR        | 95% Confidence Interval |
| <b>All Cause</b>                                       | Unexposed                     | 123,140          | --         | --                      | --        | --                      |
|                                                        | Eclampsia                     | 997              | 1.38       | 1.12-1.70               | 1.32      | 1.07-1.64               |
|                                                        | Preeclampsia                  | 25,542           | 1.71       | 1.62-1.80               | 1.66      | 1.57-1.75               |
|                                                        | Gestational Hypertension      | 28,308           | 1.75       | 1.56-1.97               | 1.70      | 1.51-1.92               |
| <b>Infectious Disease</b>                              | Unexposed                     | 99               | --         | --                      | --        | --                      |
|                                                        | Eclampsia                     | 2                | 1.41       | 0.19-10.34              | 0.73      | 0.08-6.69               |
|                                                        | Preeclampsia                  | 64               | 2.16       | 1.45-3.21               | 2.03      | 1.30-3.16               |
|                                                        | Gestational Hypertension      | 13               | 4.47       | 1.57-12.75              | 7.04      | 1.73-28.65              |
| <b>All Cancers</b>                                     | Unexposed                     | 1,429            | --         | --                      | --        | --                      |
|                                                        | Eclampsia                     | 27               | 0.94       | 0.56-1.55               | 0.96      | 0.58-1.60               |
|                                                        | Preeclampsia                  | 566              | 1.15       | 1.02-1.29               | 1.15      | 1.03-1.30               |
|                                                        | Gestational Hypertension      | 106              | 1.17       | 0.91-1.51               | 1.16      | 0.90-1.50               |
| <b>Endocrine, Nutritional, &amp; Metabolic Disease</b> | Unexposed                     | 310              | --         | --                      | --        | --                      |
|                                                        | Eclampsia                     | 13               | 1.42       | 0.63-3.20               | 1.47      | 0.64-3.40               |
|                                                        | Preeclampsia                  | 274              | 2.79       | 2.25-3.46               | 2.71      | 2.16-3.39               |
|                                                        | Gestational Hypertension      | 46               | 3.55       | 2.05-6.17               | 3.70      | 2.07-6.61               |
| <b>Disease of Blood/Blood Forming Organs</b>           | Unexposed                     | 17               | --         | --                      | --        | --                      |
|                                                        | Eclampsia                     | 0                | --         | --                      | --        | --                      |

Theilen LH, Fraser A, Hollingshaus MS, Schliep KC, Varner MW, Smtih KR, et al. All-cause and cause-specific mortality after hypertensive disease of pregnancy. *Obstet Gynecol* 2016; 128.

The authors provided this information as a supplement to their article.

|                              |                          |       |      |            |      |            |
|------------------------------|--------------------------|-------|------|------------|------|------------|
|                              | Preeclampsia             | 12    | 2.34 | 0.90-6.12  | 3.02 | 0.90-10.07 |
|                              | Gestational Hypertension | 1     | 0.78 | 0.07-8.88  | --   | --         |
| <b>Mental Disease</b>        | Unexposed                | 253   | --   | --         | --   | --         |
|                              | Eclampsia                | 7     | 2.61 | 0.61-11.12 | 4.03 | 0.82-19.92 |
|                              | Preeclampsia             | 98    | 1.22 | 0.88-1.70  | 1.20 | 0.84-1.71  |
|                              | Gestational Hypertension | 14    | 2.00 | 0.83-4.81  | 2.41 | 0.89-6.48  |
| <b>Neurologic Disease</b>    | Unexposed                | 309   | --   | --         | --   | --         |
|                              | Eclampsia                | 12    | 1.65 | 0.64-4.22  | 1.68 | 0.64-4.39  |
|                              | Preeclampsia             | 137   | 1.57 | 1.20-2.04  | 1.57 | 1.19-2.06  |
|                              | Gestational Hypertension | 15    | 1.54 | 0.71-3.35  | 1.46 | 0.65-3.27  |
| <b>Circulatory Disease</b>   | Unexposed                | 1,988 | --   | --         | --   | --         |
|                              | Eclampsia                | 69    | 1.31 | 0.91-1.91  | 1.29 | 0.88-1.88  |
|                              | Preeclampsia             | 1,080 | 2.02 | 1.83-2.23  | 2.01 | 1.81-2.23  |
|                              | Gestational Hypertension | 135   | 2.37 | 1.78-3.15  | 2.39 | 1.78-3.21  |
| <b>Respiratory Disease</b>   | Unexposed                | 418   | --   | --         | --   | --         |
|                              | Eclampsia                | 12    | 1.00 | 0.40-2.48  | 0.67 | 0.26-1.74  |
|                              | Preeclampsia             | 191   | 1.40 | 1.12-1.74  | 1.34 | 1.06-1.69  |
|                              | Gestational Hypertension | 30    | 2.03 | 1.10-3.76  | 2.21 | 1.13-4.34  |
| <b>Digestive Disease</b>     | Unexposed                | 243   | --   | --         | --   | --         |
|                              | Eclampsia                | 8     | 0.88 | 0.26-2.96  | 0.87 | 0.26-2.91  |
|                              | Preeclampsia             | 134   | 1.96 | 1.50-2.57  | 1.85 | 1.40-2.45  |
|                              | Gestational Hypertension | 34    | 2.35 | 1.34-4.12  | 2.04 | 1.11-3.77  |
| <b>Genitourinary Disease</b> | Unexposed                | 120   | --   | --         | --   | --         |
|                              | Eclampsia                | 7     | 4.76 | 0.95-23.94 | 4.23 | 0.83-21.67 |

Theilen LH, Fraser A, Hollingshaus MS, Schliep KC, Varner MW, Smtih KR, et al. All-cause and cause-specific mortality after hypertensive disease of pregnancy. *Obstet Gynecol* 2016; 128.

The authors provided this information as a supplement to their article.

|                                                            |                          |     |      |            |      |            |
|------------------------------------------------------------|--------------------------|-----|------|------------|------|------------|
|                                                            | Preeclampsia             | 118 | 3.13 | 2.23-4.41  | 2.95 | 2.04-4.26  |
|                                                            | Gestational Hypertension | 13  | 2.43 | 0.93-6.36  | 3.08 | 0.95-10.03 |
| <b>Diseases of Pregnancy, Childbirth, &amp; Puerperium</b> | Unexposed                | 26  | --   | --         | --   | --         |
|                                                            | Eclampsia                | 3   | --   | --         | --   | --         |
|                                                            | Preeclampsia             | 12  | 1.65 | 0.75-3.65  | 2.17 | 0.81-5.83  |
|                                                            | Gestational Hypertension | 6   | 1.15 | 0.42-3.17  | 1.12 | 0.33-3.81  |
| <b>Diseases of Skin &amp; Subcutaneous Tissue</b>          | Unexposed                | 16  | --   | --         | --   | --         |
|                                                            | Eclampsia                | 0   | --   | --         | --   | --         |
|                                                            | Preeclampsia             | 13  | 2.31 | 0.92-5.81  | 2.25 | 0.67-7.52  |
|                                                            | Gestational Hypertension | 0   | --   | --         | --   | --         |
| <b>Diseases of Bones &amp; Organs of Movement</b>          | Unexposed                | 75  | --   | --         | --   | --         |
|                                                            | Eclampsia                | 5   | 1.26 | 0.25-6.36  | 1.23 | 0.22-7.05  |
|                                                            | Preeclampsia             | 31  | 1.49 | 0.90-2.49  | 1.35 | 0.77-2.38  |
|                                                            | Gestational Hypertension | 14  | 5.52 | 1.80-16.93 | 4.04 | 1.17-13.94 |
| <b>Congenital Disease</b>                                  | Unexposed                | 10  | --   | --         | --   | --         |
|                                                            | Eclampsia                | 1   | 1.41 | 0.09-23.57 | --   | --         |
|                                                            | Preeclampsia             | 3   | 0.78 | 0.19-3.18  | 0.30 | 0.03-2.69  |
|                                                            | Gestational Hypertension | 3   | 5.16 | 0.53-50.41 | --   | --         |
| <b>Ill-Defined Causes</b>                                  | Unexposed                | 231 | --   | --         | --   | --         |
|                                                            | Eclampsia                | 6   | 1.11 | 0.24-5.05  | 1.02 | 0.22-4.79  |
|                                                            | Preeclampsia             | 84  | 1.40 | 0.99-1.97  | 1.41 | 0.98-2.02  |
|                                                            | Gestational Hypertension | 13  | 3.21 | 1.26-8.19  | 3.12 | 1.11-8.79  |
| <b>External Causes</b>                                     | Unexposed                | 636 | --   | --         | --   | --         |
|                                                            | Eclampsia                | 18  | 1.52 | 0.78-2.98  | 1.54 | 0.76-3.11  |

Theilen LH, Fraser A, Hollingshaus MS, Schliep KC, Varner MW, Smtih KR, et al. All-cause and cause-specific mortality after hypertensive disease of pregnancy. *Obstet Gynecol* 2016; 128.

The authors provided this information as a supplement to their article.

|                            |                          |     |      |            |      |            |
|----------------------------|--------------------------|-----|------|------------|------|------------|
|                            | Preeclampsia             | 214 | 1.41 | 1.17-1.70  | 1.30 | 1.06-1.59  |
|                            | Gestational Hypertension | 129 | 1.30 | 1.03-1.63  | 1.29 | 1.01-1.66  |
|                            |                          |     |      |            |      |            |
| <b>Suicide</b>             | Unexposed                | 128 | --   | --         | --   | --         |
|                            | Eclampsia                | 7   | 3.87 | 0.99-15.16 | 3.30 | 0.78-13.98 |
|                            | Preeclampsia             | 39  | 1.31 | 0.84-2.04  | 1.23 | 0.77-1.97  |
|                            | Gestational Hypertension | 22  | 0.85 | 0.51-1.41  | 0.88 | 0.51-1.52  |
| <b>Diabetes</b>            | Unexposed                | 222 | --   | --         | --   | --         |
|                            | Eclampsia                | 11  | 1.45 | 0.58-3.60  | 1.52 | 0.59-3.91  |
|                            | Preeclampsia             | 221 | 2.93 | 2.30-3.74  | 2.75 | 2.13-3.56  |
|                            | Gestational Hypertension | 34  | 4.61 | 2.23-9.56  | 4.48 | 2.05-9.77  |
| <b>Breast Cancer</b>       | Unexposed                | 342 | --   | --         | --   | --         |
|                            | Eclampsia                | 7   | 0.71 | 0.27-1.86  | 0.70 | 0.27-1.84  |
|                            | Preeclampsia             | 132 | 1.15 | 0.92-1.45  | 1.13 | 0.89-1.42  |
|                            | Gestational Hypertension | 30  | 1.25 | 0.77-2.03  | 1.20 | 0.74-1.97  |
| <b>Colon Cancer</b>        | Unexposed                | 137 | --   | --         | --   | --         |
|                            | Eclampsia                | 1   | --   | --         | --   | --         |
|                            | Preeclampsia             | 44  | 0.88 | 0.58-1.31  | 0.94 | 0.61-1.45  |
|                            | Gestational Hypertension | 7   | 0.74 | 0.30-1.82  | 0.84 | 0.33-2.13  |
| <b>Parkinson's Disease</b> | Unexposed                | 60  | --   | --         | --   | --         |
|                            | Eclampsia                | 1   | 0.46 | 0.05-4.51  | 0.62 | 0.06-6.48  |
|                            | Preeclampsia             | 18  | 0.98 | 0.50-1.93  | 0.91 | 0.44-1.87  |
|                            | Gestational Hypertension | 2   | 4.00 | 0.36-44.11 | 3.60 | 0.32-40.60 |

Theilen LH, Fraser A, Hollingshaus MS, Schliep KC, Varner MW, Smtih KR, et al. All-cause and cause-specific mortality after hypertensive disease of pregnancy. *Obstet Gynecol* 2016; 128.

The authors provided this information as a supplement to their article.

|                               |                          |     |      |            |      |            |
|-------------------------------|--------------------------|-----|------|------------|------|------------|
| <b>Alzheimer's Disease</b>    | Unexposed                | 19  | --   | --         | --   | --         |
|                               | Eclampsia                | 1   | 1.00 | 0.06-15.99 | 1.00 | 0.03-30.40 |
|                               | Preeclampsia             | 16  | 2.41 | 1.03-5.62  | 4.02 | 1.08-14.99 |
|                               | Gestational Hypertension | 0   | --   | --         | --   | --         |
| <b>Ischemic Heart Disease</b> | Unexposed                | 663 | --   | --         | --   | --         |
|                               | Eclampsia                | 25  | 2.77 | 1.35-5.67  | 2.39 | 1.14-5.03  |
|                               | Preeclampsia             | 400 | 2.19 | 1.86-2.58  | 2.16 | 1.82-2.57  |
|                               | Gestational Hypertension | 47  | 2.57 | 1.57-4.23  | 2.77 | 1.62-4.75  |
| <b>Stroke</b>                 | Unexposed                | 429 | --   | --         | --   | --         |
|                               | Eclampsia                | 21  | 1.60 | 0.78-3.27  | 1.56 | 0.75-3.22  |
|                               | Preeclampsia             | 225 | 1.85 | 1.49-2.30  | 1.82 | 1.45-2.28  |
|                               | Gestational Hypertension | 28  | 2.67 | 1.39-5.12  | 2.97 | 1.49-5.92  |

\*Adjusted for infant sex, gestational age at delivery, maternal and paternal education, maternal race/ethnicity, and maternal marital status.

Theilen LH, Fraser A, Hollingshaus MS, Schliep KC, Varner MW, Smtih KR, et al. All-cause and cause-specific mortality after hypertensive disease of pregnancy. *Obstet Gynecol* 2016; 128.

The authors provided this information as a supplement to their article.
